# Supplementary material for: Abnormal behavior of preferred formation of the cationic vacancies from the interior in a γ-GeSe monolayer with the stereo-chemical antibonding lone-pair state
Source: Royal Society of Chemistry journal article supplement (doi:10.1039/d2nh00573e), 2023-01-01
Supplement: d2nh00573e1.pdf [file d2nh00573e1.pdf]

## Supplementary Information

### **Abnormal behavior of preferred formation of cationic vacancy from the interior in $\gamma$ -GeSe monolayer with the stereo-chemical antibonding lone-pair state**

Changmeng Huan<sup>1,2</sup>, Yongqing Cai<sup>3\*</sup>, Devesh R. Kripalani<sup>4</sup>, Kun Zhou<sup>4</sup> and  
Qingqing Ke<sup>1,2\*</sup>

<sup>1</sup>School of Microelectronics Science and Technology, Sun Yat-sen university, Zhuhai  
519082, China

<sup>2</sup>Guangdong Provincial Key Laboratory of Optoelectronic Information Processing  
Chips and Systems, Sun Yat-sen University, Zhuhai 519082, China

<sup>3</sup>Joint Key Laboratory of the Ministry of Education, Institute of Applied Physics and  
Materials Engineering, University of Macau, Taipa, Macau, China

<sup>4</sup>School of Mechanical and Aerospace Engineering, Nanyang Technological  
University, 50 Nanyang Avenue, Singapore 639798, Singapore

\* Corresponding authors

E-mail: yongqingcai@um.edu.mo; keqingq@mail.sysu.edu.cn

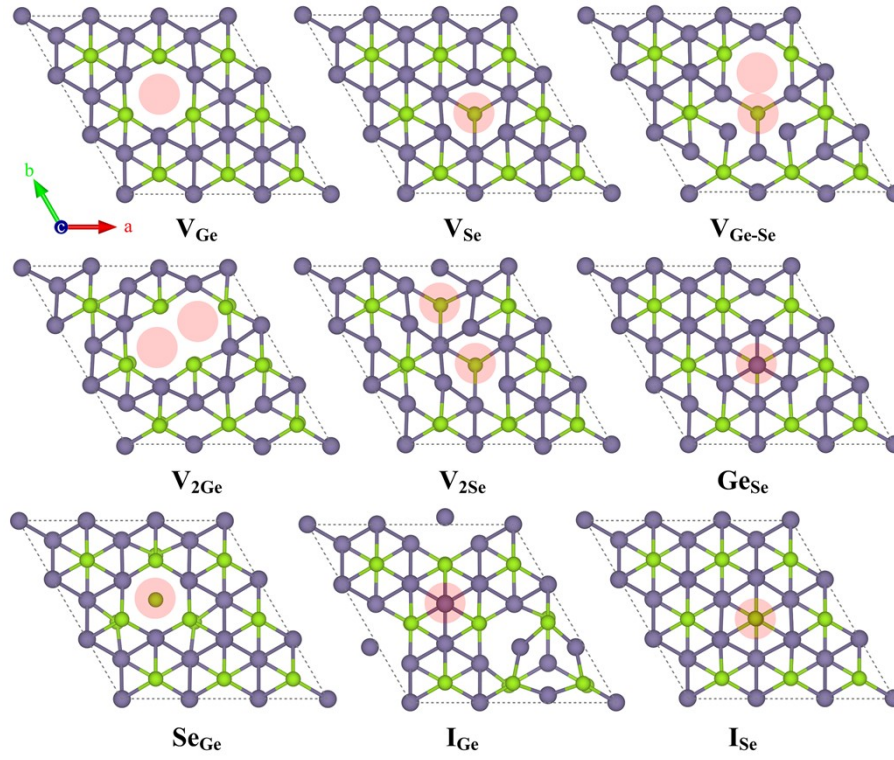

**Fig. S1** Top views of  $\gamma$ -GeSe monolayer with vacancies, anti-sites, and interstitials, where defect sites have been highlighted by translucent red-circles.

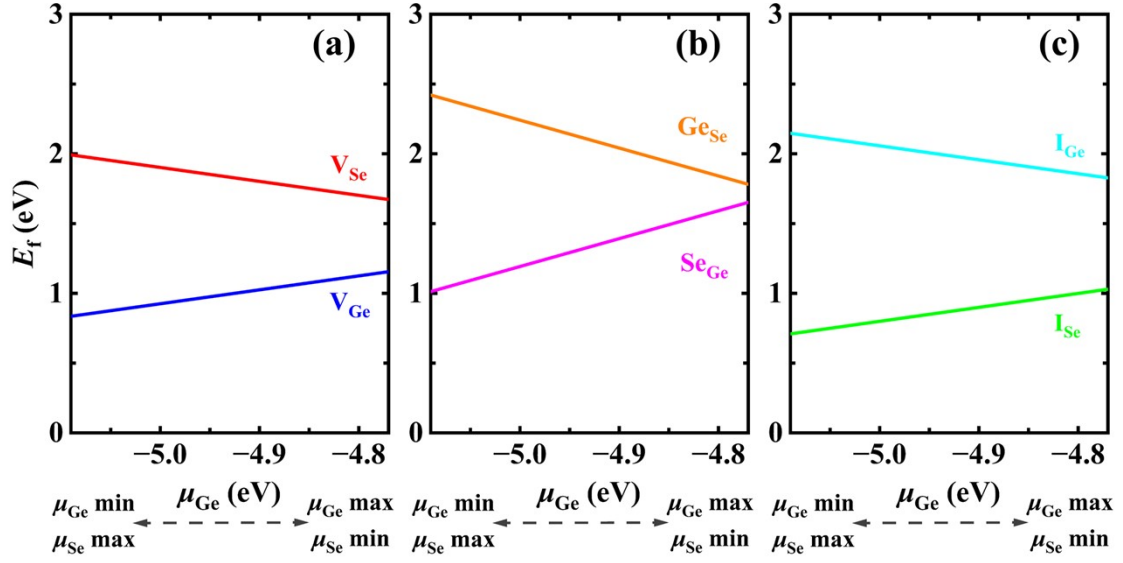

**Fig. S2** Formation energies of  $\alpha$ -GeSe monolayer with vacancy (a), anti-site (b), and interstitial (c) defects as functions of  $\mu_{\text{Ge}}$  in the range from  $-5.09$  eV to  $-4.77$  eV, where  $\gamma$ -GeSe can remain stable with respect to the formation of bulk Ge ( $\mu_{\text{Ge}} = -4.77$  eV) or  $\text{Se}_6$  molecular crystal ( $\mu_{\text{Ge}} = -5.09$  eV).

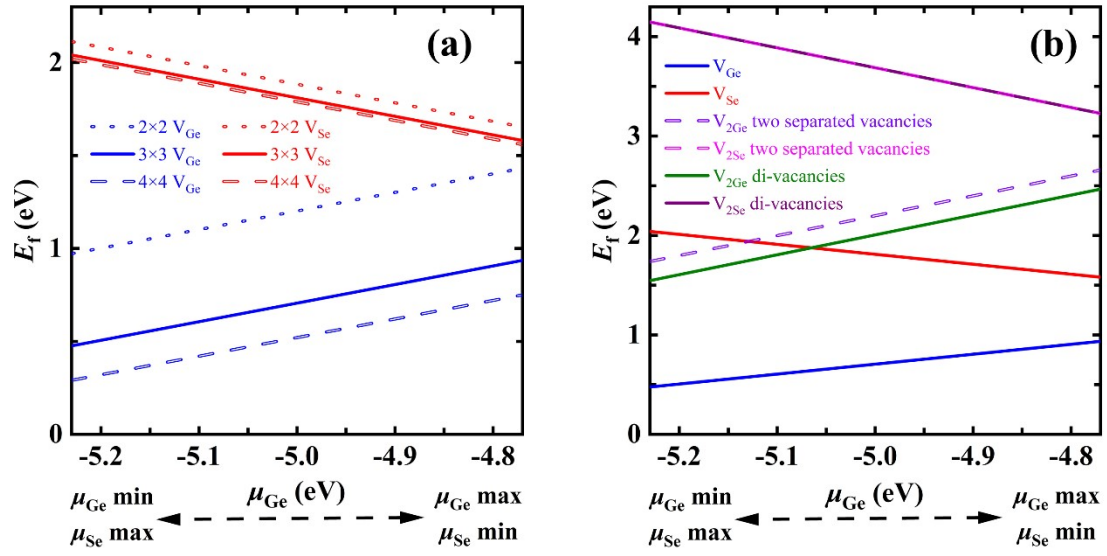

**Fig. S3** (a) The  $E_f$  of the single vacancy in a  $2 \times 2$ ,  $3 \times 3$ ,  $4 \times 4$  supercell, and (b) the  $E_f$  of the single vacancy and double vacancies in a  $3 \times 3$  supercell.

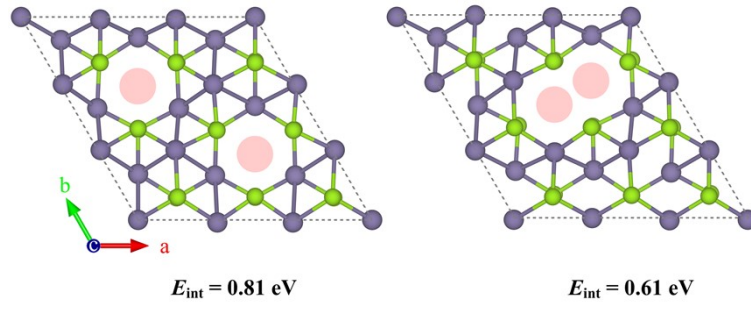

**Fig. S4** The structures and interaction energies of mono-vacancies in two representative configurations. The configurations stability between two Ge-vacancies can be investigated by their interaction energies ( $E_{\text{int}} = E_{2V} + E_p - 2E_{1V}$ ), where  $E_{2V}$  and  $E_{1V}$  mean that there are 2 mono-vacancies and 1 mono-vacancy within a  $3 \times 3$  supercell, respectively.

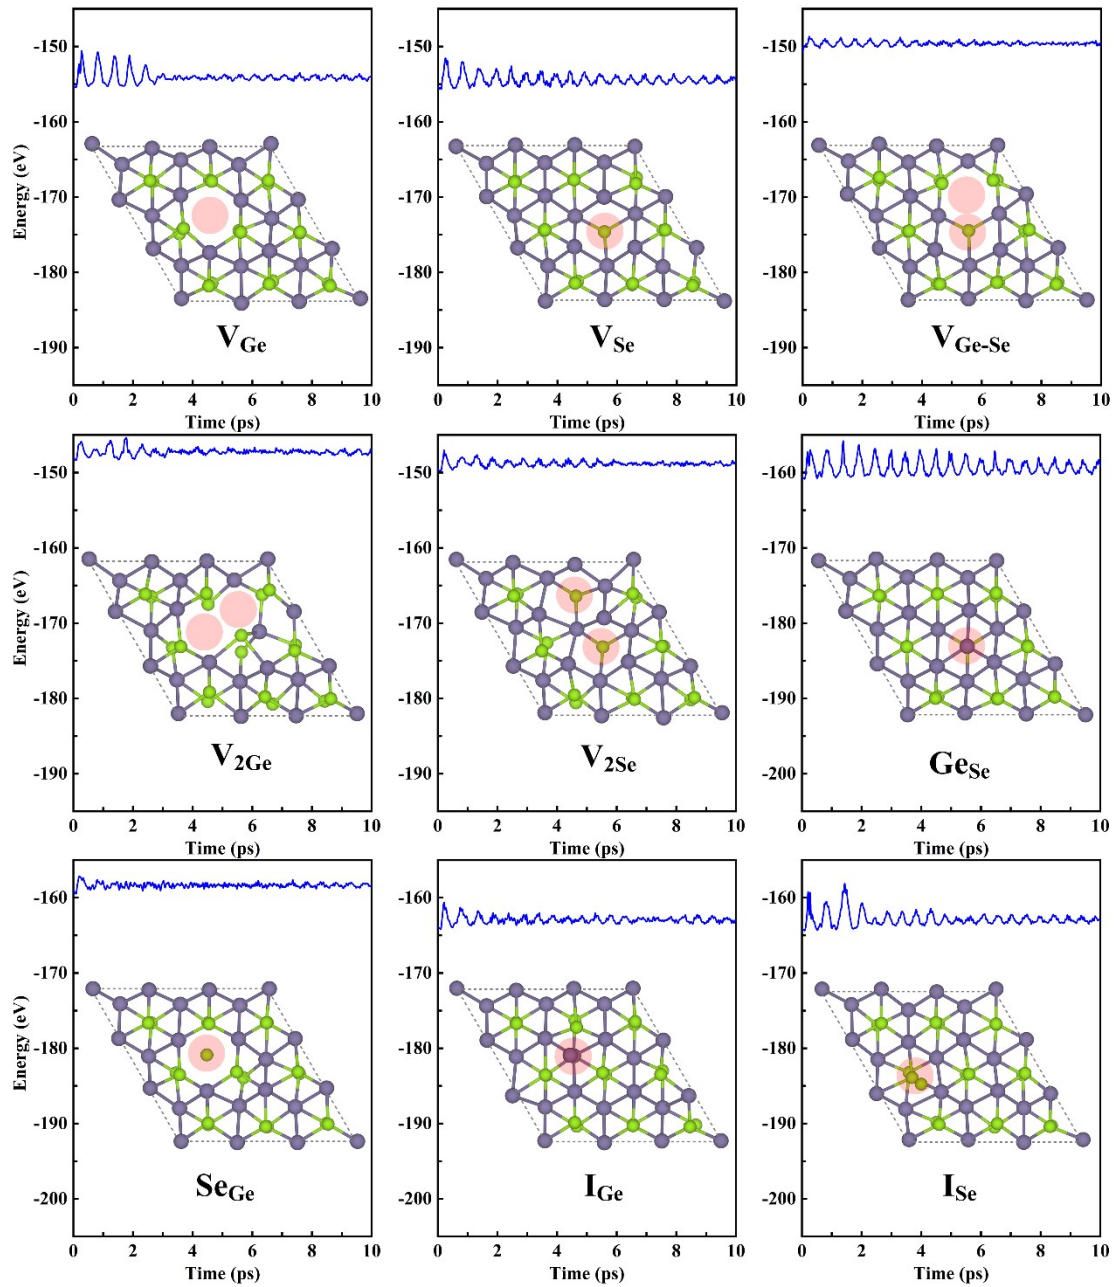

**Fig. S5** Evolution of the total energy from ab initio molecular dynamics calculations (AIMD) of  $\gamma$ -GeSe monolayers containing different defects at 300 K and a snapshot at 10 ps.

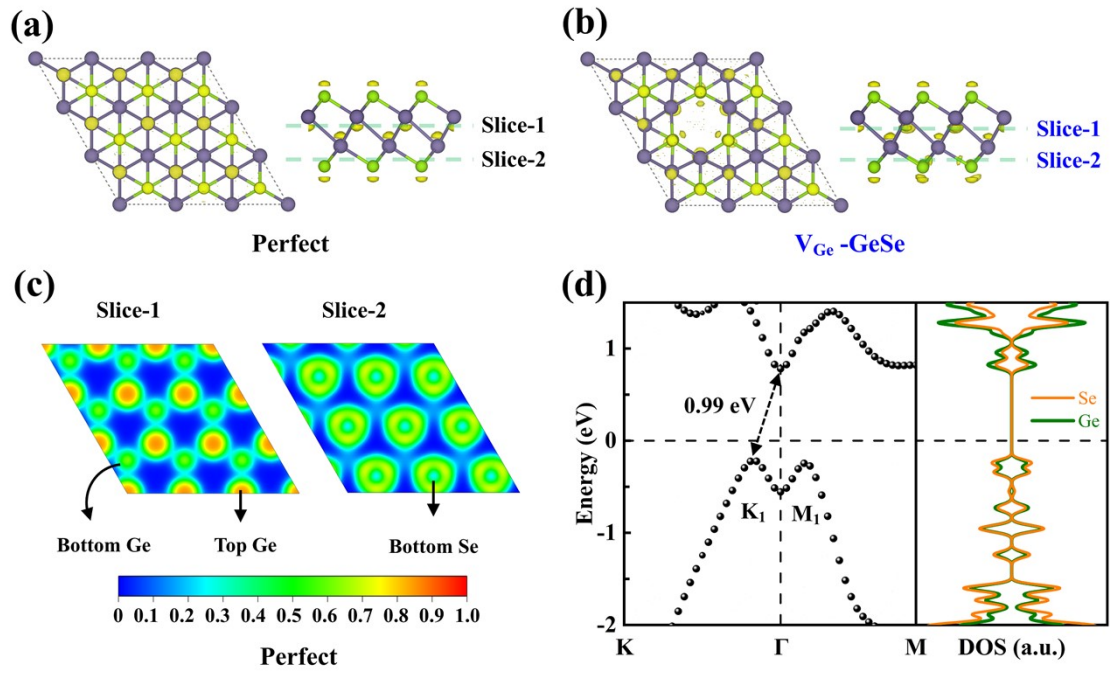

**Fig. S6** ELF (isosurface level: 0.813) of perfect  $\gamma$ -GeSe (a) and  $\gamma$ -GeSe with  $V_{Ge}$  (b), (c) 2D ELF contour mapping of the (001) plane marked by the dashed lines in (a), and (d) unfolded band structures and local density of states of the perfect  $\gamma$ -GeSe monolayer supercell.
